# Supplementary material
Source: publisher figshare collection journal article supplement (https://karger.figshare.com/ndownloader/files/30716945)
Supplement: Supplementary file 1 [file 30716945]

**Supplemental Table 1** Naranjo adverse drug reaction probability scale

Score

0

2

1

0

2

0

0

0

0

1

Total

6

Answer

No

Yes

Yes

UnknownNo

Unknown

Unknown

Unknown

Unknown

Yes

1. Are there previous conclusive reports on this reaction?

2. Did the adverse event appear after the suspected drug was administered?

3. Did the adverse reaction improve when the drug was discontinued or a specific antagonist was administered?

4. Did the adverse reaction reappear when the drug was readministered?

5. Are there alternative causes (other than the drug) that could on their own have caused the reaction?

6. Did the reaction reappear when a placebo was given?

7. Was the drug detected in the blood (or other fluids) in concentrations known to be toxic?

8. Was the reaction more severe when the dose was increased, or less severe when the dose was decreased?

9. Did the patient have a similar reaction to the same or similar drugs in any previous exposure?

10. Was the adverse event confirmed by any objective evidence?
